# Supplementary material for: The Skin Microbiota of Eleutherodactylus Frogs: Effects of Host Ecology, Phylogeny, and Local Environment
Source: Front Microbiol. 2019 Nov 6;10:2571. doi: 10.3389/fmicb.2019.02571 (PMC6856660; doi:10.3389/fmicb.2019.02571)
Supplement: Supplementary file 5 [file Table_5.XLSX]

## Sheet: Hoja1
Supplementary Table S5 Comparison of resulta for individual tests by factors (ANOSIM, PERMANOVA) and a PERMANOVA model with nested factors
Factors	ANOSIM (individual tests by factor)		PERMANOVA			PERMANOVA Model
			(individual tests by factor)			Locality/Microhabitat/Species
	unweigthed Unifrac distances
	R	p	Pseudo F	R2	p	PseudoF	R2	p
Locality	0.44	0.001	6.523	0.06362	0.001	4.1267	0.04089	0.001
Microhabitat	0.061	0.078	2.605	0.0768	0.001	0.9271	0.03675	0.796
Species	0.26	0.001	2.106	0.12192	0.001	1.5407	0.03053	0.004
	weighted unifrac distances
Locality	0.03	0.056	4.412	0.0439	0.001	5.5421	0.05494	0.001
Microhabitat	0.081	0.04	3.589	0.1028	0.001	0.7894	0.0313	0.788
Species	0.28	0.001	4.201	0.2169	0.001	1.0915	0.02164	0.345
