# Supplementary material for: The Skin Microbiota of Eleutherodactylus Frogs: Effects of Host Ecology, Phylogeny, and Local Environment
Source: Front Microbiol. 2019 Nov 6;10:2571. doi: 10.3389/fmicb.2019.02571 (PMC6856660; doi:10.3389/fmicb.2019.02571)
Supplement: Supplementary file 6 [file Table_6.xlsx]

## Sheet: Hoja1
Supplementary Table S6 Pairwise comparisons of unweighted Unifrac distances among skin bacterial communities of Eleutherodactylus species at two localities. R values, Pseudo-F and R2 values from PERMANOVA are presented. Values in bold indicate significant differences (FDR corrected p-values): * = p<0.05, ** = p<0.01. Shaded area correspond to comparisons of hosts between localities.
ANOSIM R		Charco Azul Quebrada
Locality	Host		E.w.	E.p.	E.c.	E.b.	E.l.	E.c.	E.r.
Charco Azul	E.w.		--
	E.p.		0.041	--
	E.c.		0.034	-0.015	--
	E.b.		0.033	0.0004	-0.013	--
	E.l.		0.038	0.133*	0.054	0.038	--
Quebrada	E.c.		0.432**	0.249**	0.420**	0.554**	0.458**	--
	E.r.		0.404**	0.240**	0.385**	0.468**	0.492**	0.064	--
	E.ck.		0.629**	0.474**	0.639**	0.712**	0.643**	0.293**	0.176**
PERMANOVA Pseudo-F
Locality	Host		E.w.	E.p.	E.c.	E.b.	E.l.	E.c.	E.r.
Charco Azul	E.w.		--
	E.p.		1.078	--
	E.c.		1.094	1.026	--
	E.b.		1.148	1.227	1.005	--
	E.l.		1.194	1.549*	1.2	1.26	--
Quebrada	E.c.		2.089**	1.680**	1.956**	2.404**	2.728**	--
	E.r.		2.219**	1.723**	2.129**	2.523**	3.071**	1.247	--
	E.ck.		3.498*	2.949**	3.509**	3.859*	4.565**	1.870**	1.637*
PERMANOVA R2
Locality	Host		E.w.	E.p.	E.c.	E.b.	E.l.	E.c.	E.r.
Charco Azul	E.w.		--
	E.p.		0.048	--
	E.c.		0.043	0.067*	--
	E.b.		0.038	0.048	0.053	--
	E.l.		0.041	0.072**	0.521	0.051	--
Quebrada	E.c.		0.063	0.048	0.086**	0.066	0.091**	--
	E.r.		0.077**	0.056*	0.103**	0.082**	0.118**	0.045	--
	E.ck.		0.059*	0.048	0.078**	0.062*	0.095**	0.038	0.039
